# Supplementary material
Source: PubMed Central journal article supplement (PMC3165490)
Supplement: supp_79_9_3711__1.pdf [file supp_79_9_3711__1.pdf]

LIC12017ClpB MKLDKLT SKLNEAIYN-AQASAEKLG NPEISEEHILKEVLSQPDGLVPLLISKLNLSPKS 59  
LIC11814ClpA -----MERTLRK-AWEEAKRRNEFITLEHILLALTY--DSVAKEVLEACGADIER 48  
LIC10339ClpC --MLEFTKRAKRVINEIAQDEAKRLGSDYIGPEHILLGLLKEEDSVAIKILNINLNINE 58  
LIC11418ClpX -----MAKKTGPNNGKQKLFCSFCGKEQDAVKRLVAGPGVYICD 39  
: : : : . : . : .

LIC12017ClpB FLESTENALGKQPKVGGNTSADVG--FSRSVAVSLLKAADEVRKELKDEYLSTDHILLGLM 117  
LIC11814ClpA LRKDLIDYLESELESFPESSEVDPIYITIGVQHVQLAEFHVQSTRNKKMDGGDVLAAALF 108  
LIC10339ClpC LRKEVERRTREAS--GALLMDVAG--GQDRYQKIIELSKEEAKRLKHNYVGTETHILLALL 114  
LIC11418ClpX ECISLCN-----EIIAEDHEHSHEKSEVFSEVP----- 67  
. : : .

LIC12017ClpB KNG---TG---SLKTEFLKLGLEYHKLKITLENRKGGKTIMDDS-----PEGKTDALA 164  
LIC11814ClpA REDQSNVAVYFLGSQDISRLDIVRYISHGIRKDSKKNPGKEMAGEE-----GEKISDPLR 162  
LIC10339ClpC RDNNNIAGGALYSFSVNYNVIKSEILRLLGAPPTSSVGVSTTQSGPQPRQEKTKTPILD 174  
LIC11418ClpX -----SPADIKSILDQYVIGQDHAKKALSVAVYN-----H 97  
. : : .

Walker A

LIC12017ClpB KYAKNLNELAKQGKLDPVIGRDEEIRRTIQVLSRRTKNNPVLIGEPGVGKTAIVEGLANK 224  
LIC11814ClpA AFCVDLTAKAKEGKLDPMVGREDELDRTHILCRRRKNNPIFVGEAGVGKTSIVEGLAQR 222  
LIC10339ClpC EFARDLTQLARDKCLDPVVGRAIEIQRVIQILSRKTKNNPVLVGESGVGKTAIVEGLALA 234  
LIC11418ClpX YKRVNLKEKKSDEIE-----KSNILLIGPTGSGKTLAQLAR- 136  
:\*. : : : : \*.\* : : \* . \* \* \* : : \* \*

pore

Walker B

LIC12017ClpB IVQGEVPEGIKNKTLYTLDLGSMIAGAKYRGEFEDRLKALLDEVK---SSDGEVILFIDE 281  
LIC11814ClpA VVDGKVPKLNKLVYSLDMGLLLAGTKFRGEFEERLKNVVAQIT---AQED-HVLFIDE 278  
LIC10339ClpC IVEKSVPDLLFEKRVLSLDASLIAGTKFRGEFEERLKKIMKEIT---SSTN-IIIFIDE 290  
LIC11418ClpX -----IIKVPFAIVDATALTEAGYVGEDVENIILKLIQNADNDIKKAEVGIYIDE 187  
: : . :\* : . : : \* : : : . : : : \* \* \*

LIC12017ClpB IHTLVGAGATEG-ALDASNMLKPMLARGELRCIGATTLKEYQKYIEKDAALERRFQPVVY 340  
LIC11814ClpA IHTIIGAGAVSGGSLDASNLLKPALSSGELRCIGTTTTYKEFKTIFEKDHALSRRFQKVEV 338  
LIC10339ClpC LHTLIGAGAAEG-AVDAANILKPALARGELQCIGATTSAEYRKYIEKDSALERRFQVVKV 349  
LIC11418ClpX VDKIARKSDSASITRDVS----- 205  
: : : . : : \* : :

LIC12017ClpB KEPSVEETVTILRGLKGRYELHHGIRILDSALIAAATLSNRYISDRFLPKAVDLIDEAS 400  
LIC11814ClpA GEPSETIEIILKGLLEKYESFHVKYSSSAVEQAAELSARYILDRKLPDKAIDLLDEAG 398  
LIC10339ClpC AEPSVDDAIQILQGLKKAYETHHKVRYSDKALEQSVKLSHRYINDRYLPDKAIDIIDEAG 409  
LIC11418ClpX GEGVQQALLKIIIEGTVANVPPQGGKHPHQEYLQVDTKNILFILGGAFVD----- 255  
\* . : \* : \* : . : . : \* . : \*

LIC12017ClpB SKMRIEIDSMPEELDANKRIQSLKTIEREALKEQDTASKERLKTLELDSEQEQNFQTL 460  
LIC11814ClpA ARVRLRESGK-----KVTVTR----- 414  
LIC10339ClpC AKARLANCARPQTIKDLFEEIKSLASK----- 436  
LIC11418ClpX -----

LIC12017ClpB KARWDLEKSKIGRLKQIKEEIEKYKNLEAEAERRGEINRVAEIRYGLVDLQKELESANE 520  
 LIC11814ClpA -----  
 LIC10339ClpC -----KEELVRAQEYEKAAGVRDEVNRKKQAMEEKLRSWQEKMEDFAV 479  
 LIC11418ClpX -----

LIC12017ClpB ELKKQESASRLKKEEVSEEDIANIVSRWTGIPVSKMLQGERAKLLMEDVLKTKVIGQDH 580  
 LIC11814ClpA -----EIEDLVSKIAKVPSTVKADDREKLKNLDEELKAKIYGQDS 455  
 LIC10339ClpC NIE-----EDDILSVISLWTGIPLKMEESESDKLLRLEEELKKRVVQAE 525  
 LIC11418ClpX -----LPNIIKSRTGIKTIGFGSEEQRIQSENKDVLMQVIP--- 292  
 : . : . : : . : : \* : :

Walker A

LIC12017ClpB ALRLVSEAVQRSRAGIADPNRPIGTFLFLGPTGVGKTETAKALAEFLFDDVAMTRIDMS 640  
 LIC11814ClpA AIDQLVQSIRLSRGLSEPGKPVGSFLFAGPTGVGKTELTRKLAELG---VELIRFDMS 512  
 LIC10339ClpC AIEKIAKAVRRARTGFKSERRPTGSFIFLGPVGVGKTELAKALANFLFGNDAMLRVDM 585  
 LIC11418ClpX -----E 293

pore

Walker B

LIC12017ClpB EYMEAHSVARLIGAPPGYVGYDEGGQLTEAVRRRPYSLILFDEIEKANPEVFNIFLQILD 700  
 LIC11814ClpA EYMEKHTVSRLIGSPPGYVGFEGGGQLTDAVYRNPHCVLLLEIEKAHEDIYNILLQIMD 572  
 LIC10339ClpC EYMEPHAVSRLIGAPPGYVGYDDGGQLTEFVRKRYPYSIILLDEIEKAHHDIFNILLQIME 645  
 LIC11418ClpX DLIKFGLIPEFIGRLP-----IVATLQELNVDMLRQIFREP 330  
 : : : . : : \* \* : . : : : : : . : : .

LIC12017ClpB EGRLTDGKGRNVDFKNTVIIILTSNIGS-EILGSSEYTSEE-----KERLVEQRLK 751  
 LIC11814ClpA HATLTDNNGRKSDFRQVILVMTTNTGARERSTNPVGFAND-----LLEDRSLKATIEK 625  
 LIC10339ClpC EGRLTDTKGRKVNFRDTIIIMTSNIGAKEIQAGGRLGFEDRKDEALKYKSDQTRDQLK 705  
 LIC11418ClpX NSVLKQYTR-----LLELENVKLT 349  
 . . \* . : . : . : .

LIC12017ClpB FKPEFLNRIDEVILFHSITDSVIHKIADIQLEGLRQKAKENGLDVSFTNELKDYSKAGF 811  
 LIC11814ClpA FSPEFRNRLTAVIEFSSLNQENVTKVAKQLALLQERLNSKQIELEFNEVDLVYIADKAY 685  
 LIC10339ClpC FNPEFLNRVDEVIYFGSLTKENIMSIIDIMVTDNKRLEHTIQISITQAANKNHIMDIGY 765  
 LIC11418ClpX FHDEAIDKIAELAIKR-----ESGARGLRAIVENIMLDLMDIPSRKDIEEVII 398  
 \* \* : : : : . . : : : : .

LIC12017ClpB DAEYGARPLKRLIQREVGNALSRYLIDGKFTNGQNVTVDYRQGVVVVV----- 860  
 LIC11814ClpA TPEFGARPVQRWIDTHHISKRISEEILFGVLKSGGKAKLISGKEGEMEFSSGKKN----- 740  
 LIC10339ClpC DEKFGARPLRRVFQRELEDHMAVQTLKGAYKEPTKIEIDFKEGKLEFLETPWTDYKPVDP 825  
 LIC11418ClpX TAEVIANRVAPTLILKESKIA----- 420  
 : \* . : : . . : :

LIC12017ClpB -----  
 LIC11814ClpA -----  
 LIC10339ClpC KTGNDNSSGNPERSEEIALV 846  
 LIC11418ClpX -----

|                    |                                                                                       |
|--------------------|---------------------------------------------------------------------------------------|
| AAA 1 domain       |  |
| AAA 2 domain       |  |
| Walker A           | (G/A)XXXXGK(S/T)                                                                      |
| Walker B           | HyHyHyHyD(E)                                                                          |
| ClpP binding motif | (L/I/V)G(F/L)                                                                         |
