# Supplementary material
Source: PubMed Central journal article supplement (PMC3165490)
Supplement: supp_79_9_3711__2.pdf [file supp_79_9_3711__2.pdf]

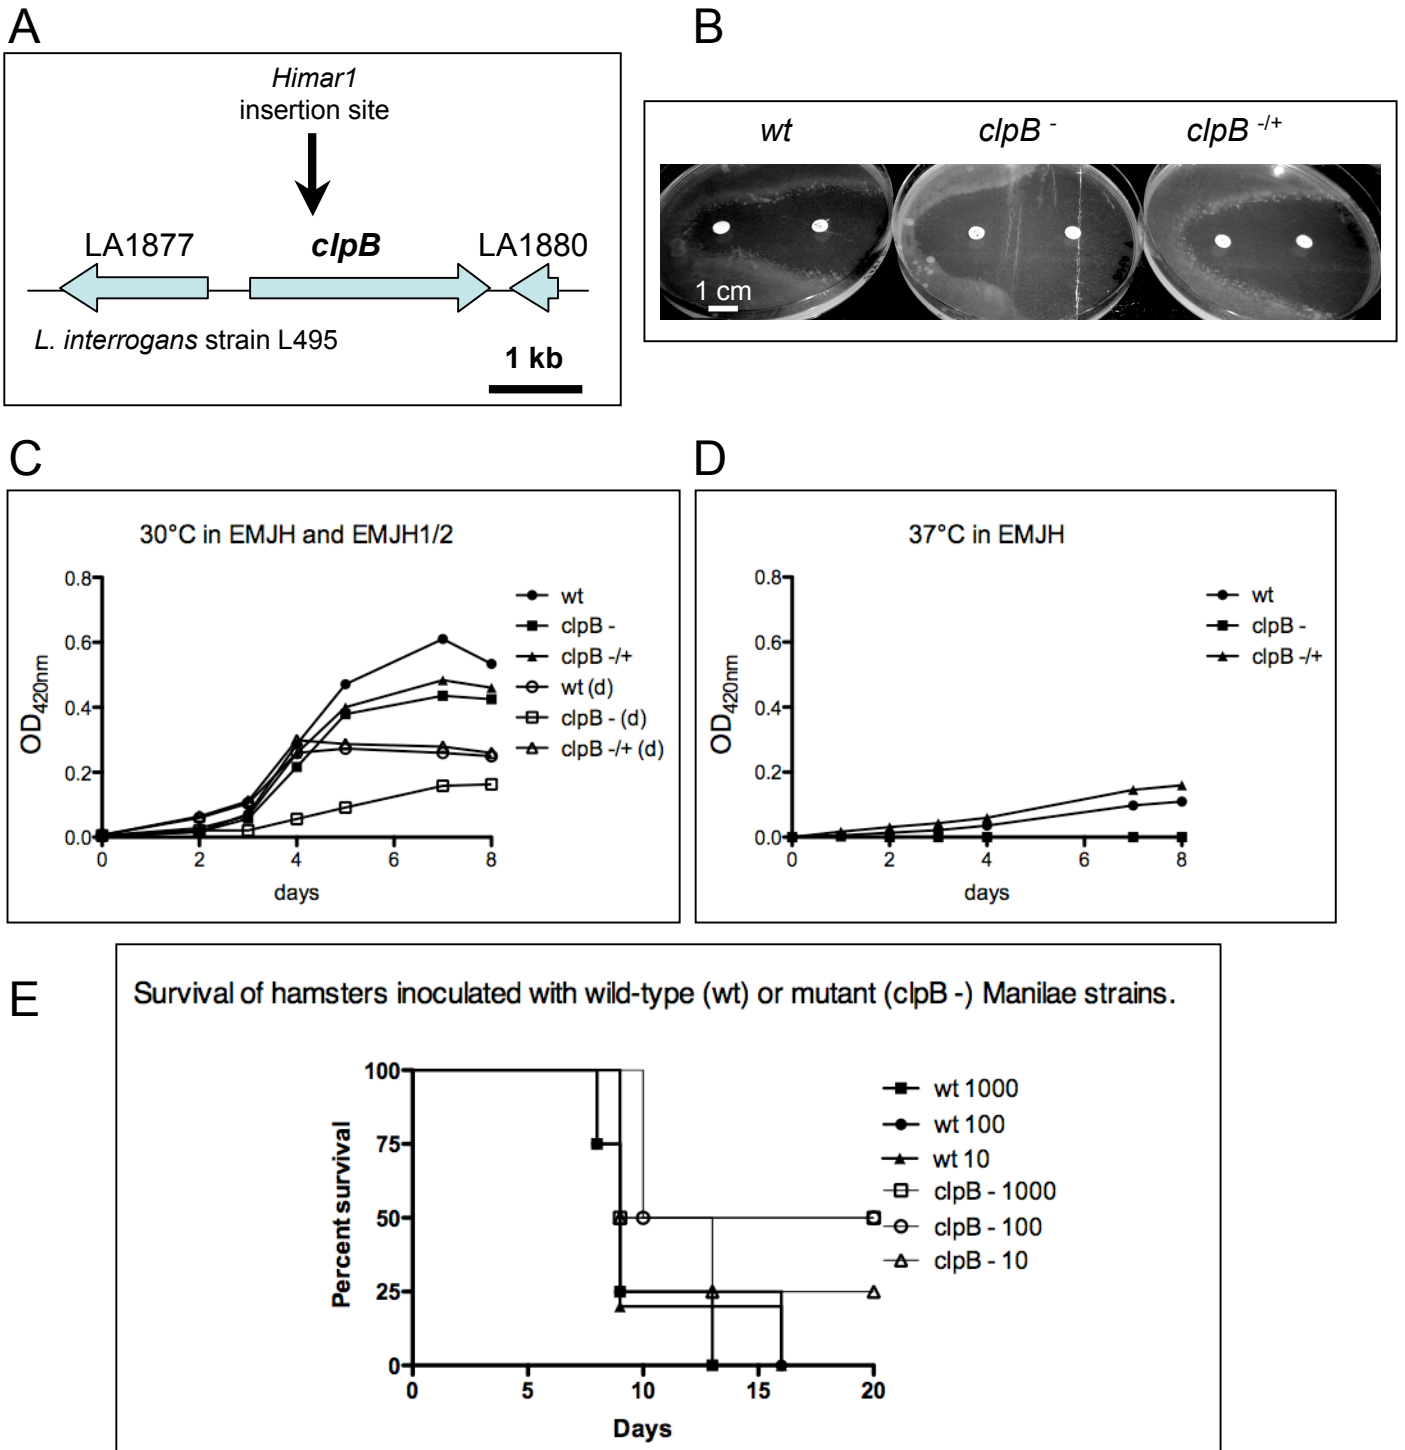

**Supplemental data 2** (data on the *clpB* mutant in *L. interrogans* serovar *Manilae* strain L495) (A) The arrow indicates the insertion site of the *Himar1* transposon in strain L495, (B) disc diffusion assays with 10 mM (left) and 20 mM (right) hydrogen peroxide on wild-type (*wt*), *clpB* mutant (*clpB*<sup>-</sup>), and complemented (*clpB*<sup>-/+</sup>) strains, (C and D) Growth kinetics of wild type (*wt*), *clpB*<sup>-</sup>, and *clpB*<sup>-/+</sup> strains in EMJH and diluted EMJH (d) at 30°C (E) Groups of 4 hamsters were intraperitoneally inoculated with 10, 100, and 1000 leptospores of wild-type (*wt*) and *clpB* mutant (*clpB*<sup>-</sup>) strains and monitored for 21 days.
